# Supplementary material for: Co-substitution design: a new glaserite-type rare-earth phosphate K2RbSc(PO4)2 with high structural tolerance
Source: Royal Society of Chemistry journal article supplement (doi:10.1039/d3dt02494f), 2023-01-01
Supplement: d3dt02494f1.pdf [file d3dt02494f1.pdf]

## Supporting Information for

# Co-substitution Design: A New Glaserite-type Rare-earth Phosphate $K_2RbSc(PO_4)_2$ with High Structural Tolerance

Jingfang Zhou,<sup>1</sup> Pifu Gong,<sup>4</sup> Mingjun Xia<sup>2,3</sup> and Qian Wu<sup>2,3,\*</sup>

<sup>1</sup>Ocean College of Tangshan Normal University, Hebei Tangshan 063000, China

<sup>2</sup>Beijing Center for Crystal Research and Development, Key Laboratory of Functional Crystals and Laser Technology, Technical Institute of Physics and Chemistry, Chinese Academy of Sciences, Beijing 100190, China

<sup>3</sup>School of Chemical Science, University of Chinese Academy of Sciences, Beijing 100049, China

<sup>4</sup>Functional Crystals Lab, Key Laboratory of Functional Crystals and Laser Technology, Technical Institute of Physics and Chemistry, Chinese Academy of Sciences, Beijing 100190, China.

### Contents:

#### 1. Supplementary figures

**Figure S1.** Experimental and calculated powder X-ray diffraction patterns of  $K_2RbSc(PO_4)_2$ .

**Figure S2.** The photograph of  $K_2RbSc(PO_4)_2$  crystal.

**Figure S3.** The elemental analyses of K, Rb, Sc, P and O atoms for  $K_2RbSc(PO_4)_2$  by EDS.

**Figure S4.** The plot shows  $(F(R) \times E)^2 - E$  of  $K_2RbSc(PO_4)_2$ ,  $K_2RbEr(PO_4)_2$  and  $K_2RbLu(PO_4)_2$ .

**Figure S5.** (a) The DSC and TG curves of  $K_2RbSc(PO_4)_2$  in the temperature range of 50–1000 °C (The inset plot shows the temperature range of 50–150 °C); (b) The DTA and TG curves of  $K_2RbEr(PO_4)_2$  in the temperature range of 50–1050 °C.

**Figure S6.** The powder XRD patterns of  $K_2RbSc(PO_4)_2$  before and after melting.

#### 2. Supplementary tables

**Table S1.** Atomic coordinates and equivalent isotropic displacement parameters for  $K_2RbSc(PO_4)_2$ .

**Table S2.** Selected bond lengths (Å) for  $K_2RbSc(PO_4)_2$ .

**Table S3.** Selected bond angles (°) for  $K_2RbSc(PO_4)_2$ .

**Table S4.** The element compositions of  $K_2RbSc(PO_4)_2$  by EDS.

**Table S5.** The bond valence sums (BVS) of  $K_2RbSc(PO_4)_2$ .

1. Supplementary figures

**Figure S1.** Experimental and calculated powder X-ray diffraction patterns of  $K_2RbSc(PO_4)_2$ .

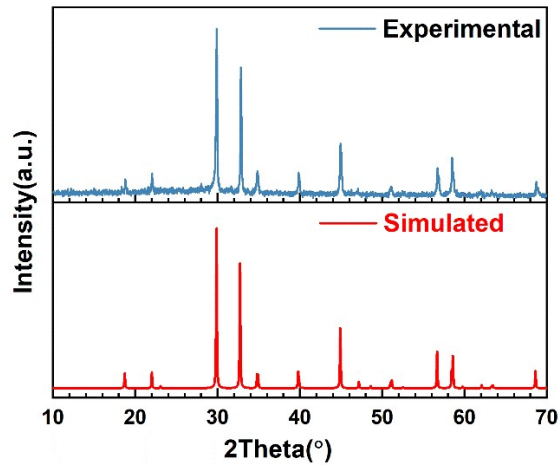

**Figure S2.** The photograph of  $K_2RbSc(PO_4)_2$  crystal.

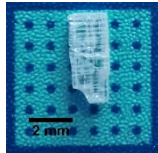

**Figure S3.** The elemental analyses of K, Rb, Sc, P and O atoms for  $K_2RbSc(PO_4)_2$  by EDS.

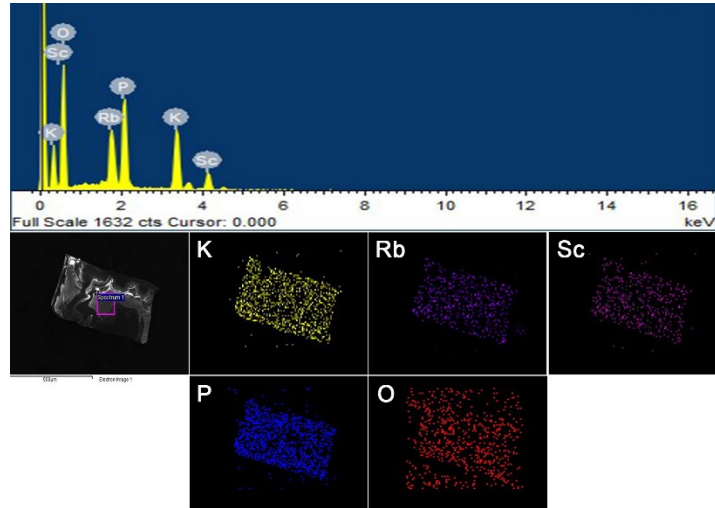

**Figure S4.** The plot shows  $(F(R) \times E)^2 - E$  of  $K_2RbSc(PO_4)_2$ ,  $K_2RbEr(PO_4)_2$  and  $K_2RbLu(PO_4)_2$ .

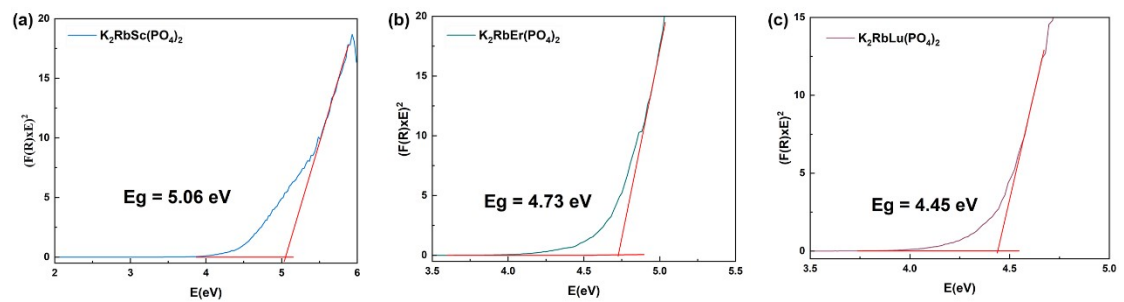

**Figure S5.** (a) The DSC and TG curves of  $K_2RbSc(PO_4)_2$  in the temperature range of 50–1000 °C (The inset plot shows the temperature range of 50–150 °C); (b) The DTA and TG curves of  $K_2RbEr(PO_4)_2$  in the temperature range of 50–1050 °C.

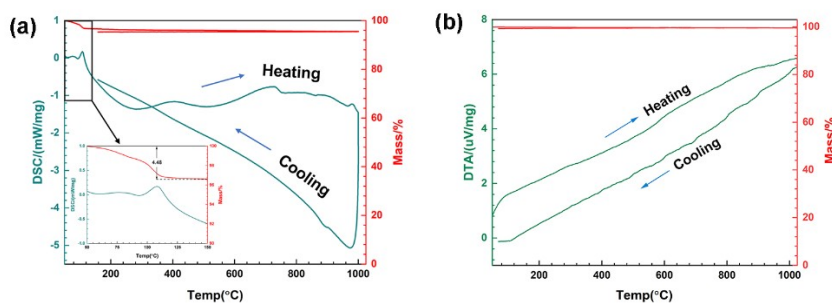

**Figure S6.** The powder XRD patterns of  $K_2RbSc(PO_4)_2$  before and after melting.

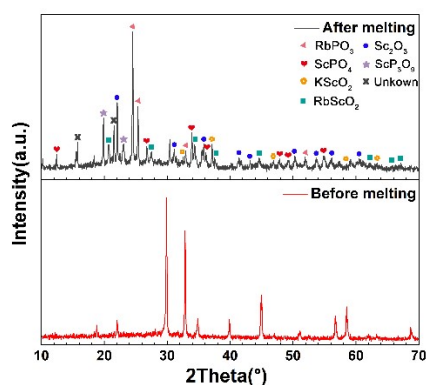

## 2. Supplementary tables

**Table S1** Atomic coordinates and equivalent isotropic temperature factors of  $K_2RbSc(PO_4)_2$ .

| Atom | Wyckoff | x/a        | y/b        | z/c        | U(eq)/(Å <sup>2</sup> ) |
|------|---------|------------|------------|------------|-------------------------|
| K1   | 2d      | 0.0113(11) | 0.0113(11) | 0.0183(16) | 0.0056(5)               |
| Rb1  | 1b      | 0.0315(11) | 0.0315(11) | 0.0208(13) | 0.0157(6)               |
| Sc1  | 1a      | 0.0045(12) | 0.0045(12) | 0.025(2)   | 0.0023(6)               |
| P1   | 2d      | 0.0078(12) | 0.0078(12) | 0.0054(16) | 0.0039(6)               |
| O1   | 2d      | 0.082(6)   | 0.082(6)   | 0.026(6)   | 0.041(3)                |
| O2   | 6i      | 0.012(2)   | 0.009(3)   | 0.059(5)   | 0.0043(16)              |

**Table S2.** Selected bond lengths (Å) for  $K_2RbSc(PO_4)_2$ .

| Atom       | Length/Å  |
|------------|-----------|
| Sc1—O2 × 6 | 2.104(7)  |
| P1—O2 × 3  | 1.526(6)  |
| P1—O1      | 1.480(16) |
| K1—O2 × 6  | 2.822(2)  |
| K1—O1      | 2.592(16) |
| Rb1—O1 × 6 | 3.223(3)  |
| Rb1—O2 × 6 | 3.138(8)  |

**Table S3.** Selected bond angles (°) for  $K_2RbSc(PO_4)_2$ .

| Atom | angle/° | Atom | angle/° |
|------|---------|------|---------|
|------|---------|------|---------|

|           |            |           |            |
|-----------|------------|-----------|------------|
| O2—Sc1—O2 | 89.7(3)    | O2—Rb1—O2 | 123.57(19) |
| O2—Sc1—O2 | 90.3(3)    | O2—Rb1—O2 | 180.0      |
| O2—Sc1—O2 | 180.0(3)   | O2—Rb1—O1 | 84.4(2)    |
| O2—Sc1—O2 | 180.0      | O2—Rb1—O1 | 134.8(3)   |
| O1—P1—O2  | 109.0(3)   | O2—Rb1—O1 | 45.2(3)    |
| O1—K1—O2  | 104.17(16) | O2—Rb1—O1 | 95.6(2)    |
| O1—K1—O1  | 67.8(2)    | O1—Rb1—O1 | 116.00(18) |
| O1—K1—O1  | 106.7(3)   | O1—Rb1—O1 | 64.00(18)  |
| O2—Rb1—O2 | 56.43(19)  | O1—Rb1—O1 | 180.0      |

**Table S4.** The element compositions of  $K_2RbSc(PO_4)_2$  by EDS.

| Element | Weight% | Atomic% | Atomic ratio |
|---------|---------|---------|--------------|
| O K     | 60.89   | 79.45   |              |
| P K     | 12.84   | 8.94    |              |
| K K     | 10.30   | 5.69    | 1.96         |
| Sc K    | 4.07    | 2.91    | 1            |
| Rb L    | 11.91   | 3.01    | 1.03         |
| Totals  | 100.00  | 100     |              |

**Table S5.** The bond valence sums (BVS) of  $K_2RbSc(PO_4)_2$ .

| Element | BVS     |
|---------|---------|
| K1      | 1.2343  |
| Rb1     | 0.8692  |
| Sc1     | 2.9215  |
| P1      | 5.1546  |
| O1      | -2.1210 |
| O2      | -1.9216 |
